# Supplementary material for: Application of 2,4-Epibrassinolide Improves Drought Tolerance in Tobacco through Physiological and Biochemical Mechanisms
Source: MDPI journal article supplement (doi:10.3390/biology11081192), 2022-08-08
Supplement: s1 [file s1]

# Application of 2,4-Epibrassinolide Improves Drought Tolerance in Tobacco Through Physiological and Biochemical Mechanisms

Rayyan Khan, Xinghua Ma\*, Quaid Hussain, Muhammad Asim, Anas Iqbal, Xiaochun Ren, Shahen Shah, Keling Chen, Yi Shi

\* **Correspondence:** maxinghua@caas.cn

**Table S1: Primers list for RT-qPCR**

| Gene Name     | Forward Primer (5'-3')    | Reverse Primer (5'-3')   |
|---------------|---------------------------|--------------------------|
| <i>YUCCA6</i> | TAGCCGATGGTTGATCGTGG      | TCCAAGCACACCTCCATTCC     |
| <i>ARF9</i>   | TAGAGGCCAACCTCGGAGAC      | GAGCAAGCCGTCTAACACCA     |
| <i>PIN1</i>   | CTGTTGGCCTTCGTGGAGTT      | CCGTGCTAAGAATGTCAGGGT    |
| <i>ABP1</i>   | CTCGCCATGTTCTCGTAGTGG     | CCTGTGGAAGCTCGCTGAT      |
| <i>SAUR19</i> | GAGAGAGCCAGAAGAAGCGA      | CAAGCGGGAGGTGAGATCAAT    |
| <i>GRF1</i>   | TAGCCACGGTGAACCTATGC      | GGGCTGCTATCCCACATCTC     |
| <i>SAUR32</i> | GTGTCTGGCAATTACTGTGGG     | AGCTTCCTTGTCATCACCCC     |
| <i>IAA26</i>  | AAGCTGGAGTTAAGGCTTGGT     | TGCTGATATTGTAACCAAAAGGGA |
| <i>ARF6</i>   | CCCAATAGGTGGAATGCAAATG    | CGAAGTGAGAGCCTGTTTAGAG   |
| <i>DWF4</i>   | AAATGATGGTGGAAGCTGCTGT    | GTCTCGTAACCACCTAGTAAGGAA |
| <i>HERK2</i>  | CGATGCGGTTTCAACGACAA      | GTTGGTCTGCTCTTCCCCTC     |
| <i>BZR2</i>   | ATTGGTGGTTCGGCATCAGT      | GAGACTGGGCTGGGGATAGA     |
| <i>BZR1</i>   | CATCTTATCAGCCGAGTCTAACC   | TGGAGGAAGTGATGAAGGAATG   |
| <i>BRL3</i>   | CGAAGGGGAGAAAGGAGGGAT     | TTACCAGCCTTGCCATTCCA     |
| <i>FeSOD</i>  | ACCCTCAAGGCTATCAAATGTTAAG | ACGATGATGCTCTCCCCAAT     |
| <i>POD</i>    | GCTCATTCTTCTTCTTTTGCCGTT  | GAGGCTAGCCCCAATACGAG     |
| <i>CAT</i>    | CAATGTGCACTGGCAAACGA      | GATCAGACAAGGCCTCCACC     |
| <i>P5CS1</i>  | AGTGGCCCTCCCCGTAATCC      | GAAGAGGGTGCCGATACATTCC   |
| <i>Actin</i>  | CAAGGAAATCACCGCTTTGG      | AAGGGATGCGAGGATGGA       |
